# Supplementary material for: Anchored and confined Pt nanoparticles in radial mesoporous hollow carbon spheres enhancing oxygen reduction reaction stability
Source: Royal Society of Chemistry journal article supplement (doi:10.1039/d3nj01406a), 2023-01-01
Supplement: d3nj01406a1.pdf [file d3nj01406a1.pdf]

**Anchored and Confined Pt Nanoparticles in Radial Mesoporous Hollow Carbon Spheres  
Enhancing Oxygen Reduction Reaction Stability**

Lijuan Cao<sup>a,b,c</sup>, Hongwei Zhu<sup>a</sup>, Yadong Li<sup>a,b,c</sup>, Chen Yang<sup>a</sup>, Xilong Wang<sup>a</sup>, Han-Pu Liang<sup>a,b,c,\*</sup>

<sup>a</sup> Key Laboratory of Biofuels, Qingdao Institute of Bioenergy and Bioprocess Technology,  
Chinese Academy of Sciences, No.189 Songling Road, Qingdao 266101, P. R. China

<sup>b</sup> Sino-Danish College, University of Chinese Academy of Sciences, No. 380 Huaibeizhuang,  
Huairou district, Beijing 101408, P. R. China

<sup>c</sup> Sino-Danish Centre for Education and Research, No. 380 Huaibeizhuang, Huairou district,  
Beijing 101408, P. R. China

\*Corresponding Author. E-mail: lianghp@qibebt.ac.cn (H.-P. Liang)

## Experimental section

**Materials and chemicals.** Tetraethyl orthosilicate (TEOS), formaldehyde (37 wt%), and chloroplatinic acid hexahydrate ( $\text{H}_2\text{PtCl}_6 \cdot 6\text{H}_2\text{O}$ ) were purchased from Aladdin. Ammonia ( $\text{NH}_3 \cdot \text{H}_2\text{O}$ ), resorcinol, ethanol, hydrofluoric acid (HF), ethylene glycol, and nitric acid ( $\text{HNO}_3$ , 65 wt%) were obtained from Sinopharm Chemical Reagent Beijing Co., Ltd. 5 wt% Nafion ionomer was bought from Sigma-Aldrich. Commercial Pt/C (20 wt%) was purchased from Johnson Matthey. Vulcan XC-72R was bought from Cabot Corporation.

**Characterization.** Scanning electron microscopy (SEM) images were taken on a Hitachi S4800 field-emission SEM microscope. Transmission electron microscopy (TEM) measurements were conducted on a Hitachi H-7650. High resolution transmission electron microscopy (HRTEM), high-angle annular dark-field scanning transmission electron microscope (HAADF-STEM) images, and energy dispersive X-ray (EDX) mapping images were obtained from a JEOL LEM 2200FS/TEM.  $\text{N}_2$  adsorption-desorption isotherms were measured on Micromeritics ASAP 2460. The powder X-ray diffraction (XRD) data were obtained from a Bruker D8-Advance X-ray diffractometer. Raman spectra were collected on a Thermo DXR spectrometer system.  $\text{N}_2$  adsorption-desorption isotherms were measured on Micromeritics ASAP 2460 analyzer. Chemical compositions of catalysts were analyzed by X-ray photoelectron spectroscopy (XPS). The contents of Pt in the catalysts were obtained from inductively coupled plasma optical emission spectroscopy (Agilent, ICP-OES).

**Electrochemical measurements.** The activity of catalysts for the oxygen reduction reaction (ORR) was evaluated by rotating disc electrodes (RDE) with a three-electrode system. A platinum wire,  $\text{Hg}/\text{HgSO}_4$ , and a glassy carbon disk electrode (4 mm diameter) were employed

as the counter, reference, and working electrodes, respectively. To prepare the working electrode material, 2.5 mg of the catalysts and 20  $\mu\text{L}$  of 5 wt% Nafion were dispersed in 980  $\mu\text{L}$  of ethanol. After sonication for 30 min, 7.5  $\mu\text{L}$  of the homogeneous ink was dropped onto the glassy carbon electrode. All potentials were quoted versus the reversible hydrogen electrode (RHE). The cyclic voltammetry (CV) curves were obtained in  $\text{N}_2$ -saturated 0.1 M  $\text{HClO}_4$  with a scan rate of  $50 \text{ mV s}^{-1}$ . The ORR polarization curves were recorded in the  $\text{O}_2$ -saturated 0.1 M  $\text{HClO}_4$  solution with a sweep rate of  $10 \text{ mV s}^{-1}$  at 1600 rpm. For the accelerated durability test (ADT), the CV and ORR polarization curves were measured after sweeping 10000, 20000, and 30000 cycles in the range of 0.6-1.1  $\text{V}_{\text{RHE}}$  at a rate of  $100 \text{ mV s}^{-1}$ , together with a rotation speed of 1600 rpm, in an  $\text{O}_2$ -saturated 0.1 M  $\text{HClO}_4$  solution at  $25^\circ\text{C}$ . A commercial Pt/C (20 wt%) catalyst was also studied for comparison.

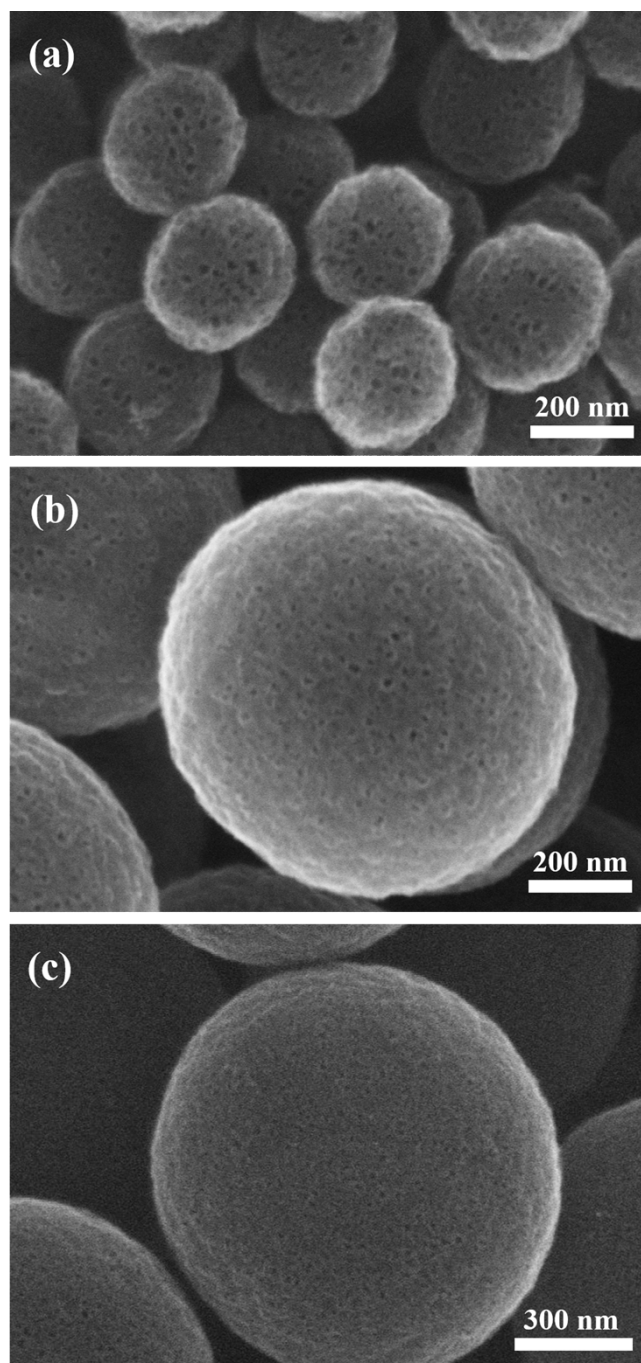

**Fig. S1.** SEM images of (a) HCS-W, (b) HCS and (c) HCS-E.

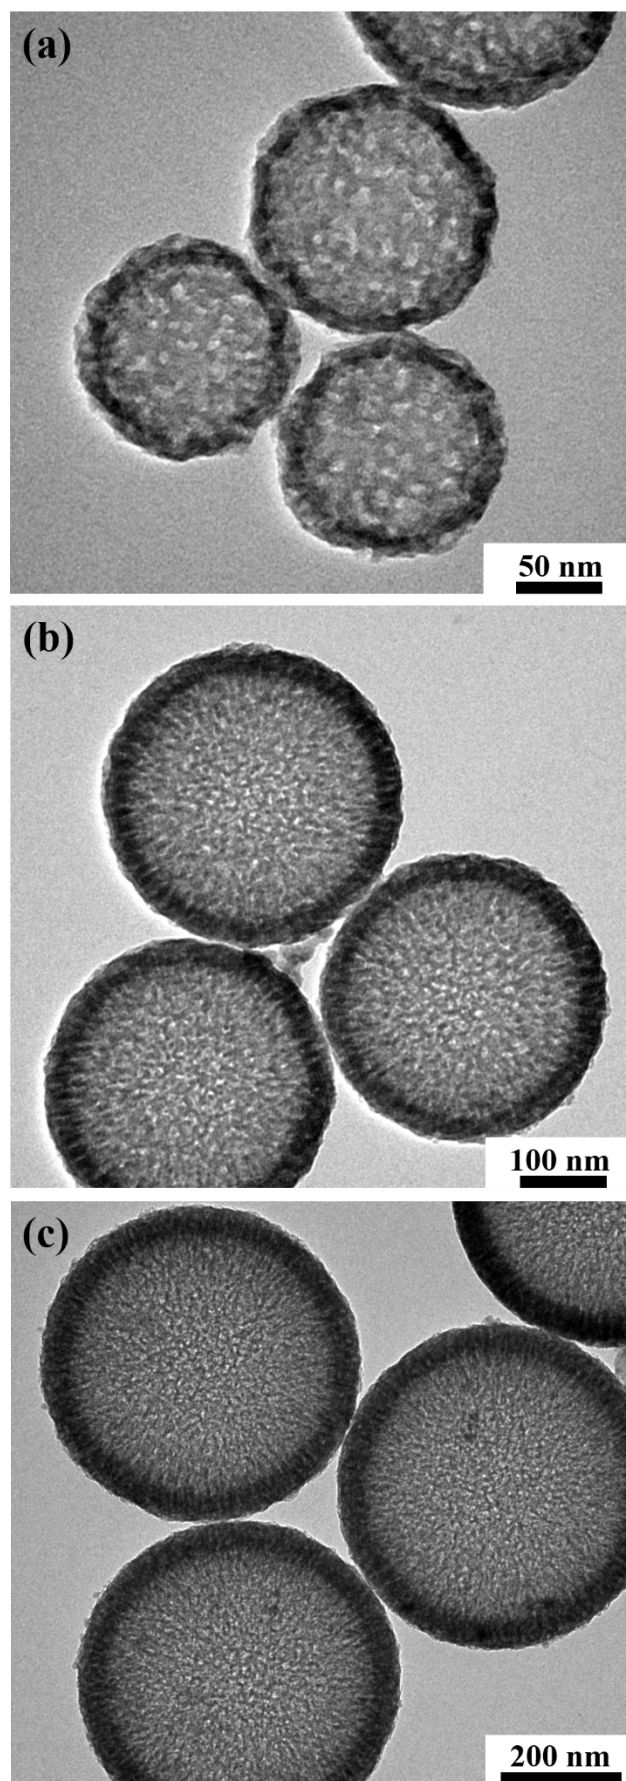

**Fig. S2.** TEM images of (a) HCS-W, (b) HCS and (c) HCS-E.



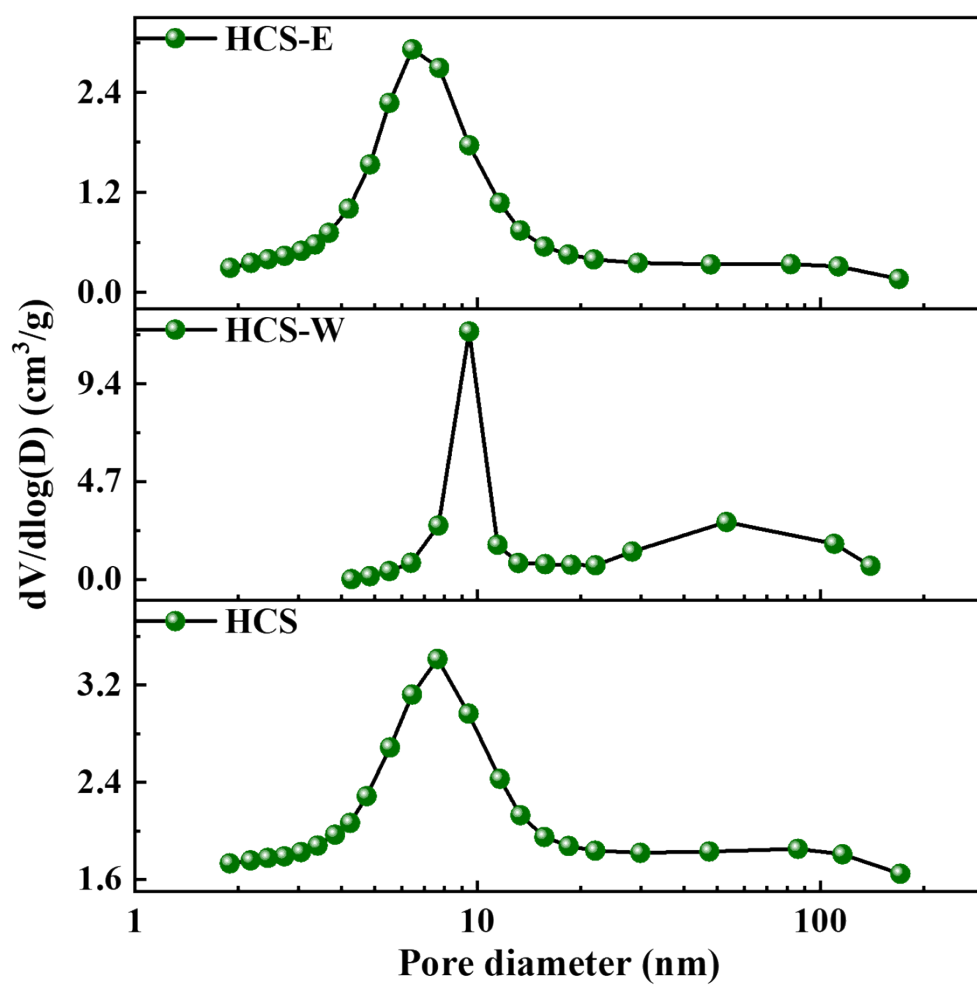

**Fig. S3.** Pore size distribution of HCS-E, HCS-W, and HCS.

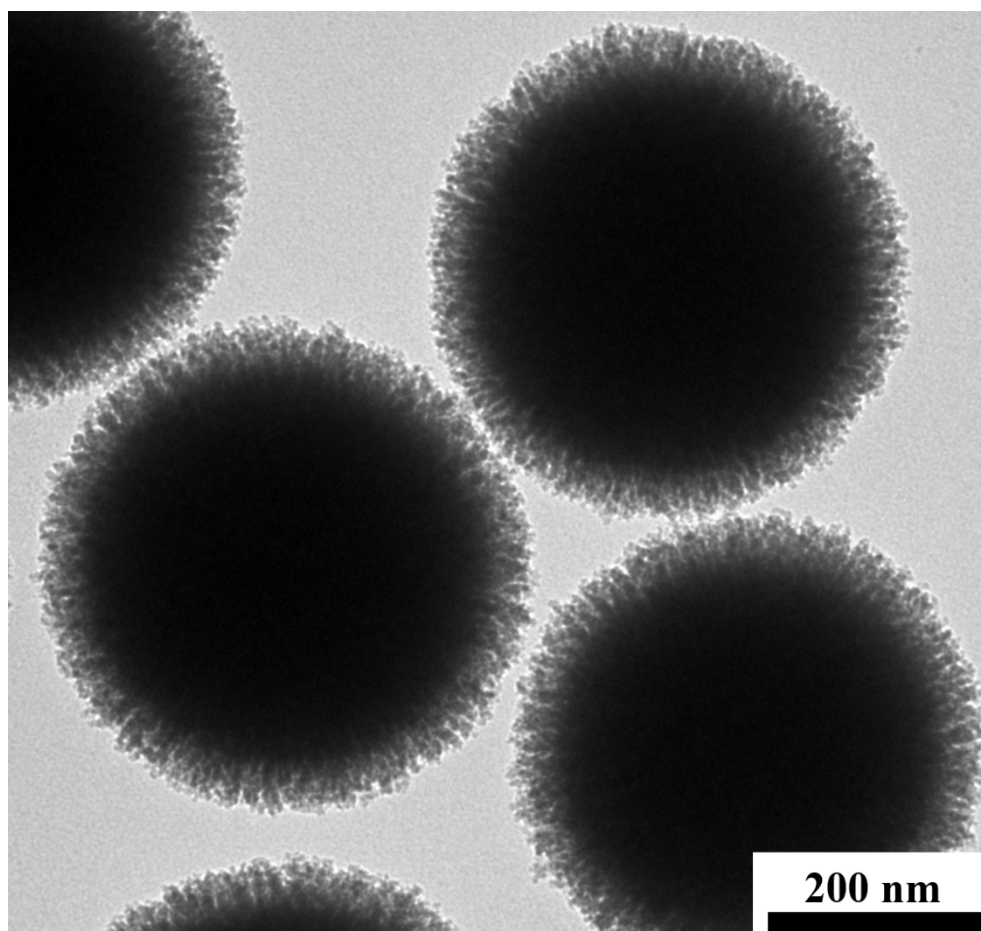

**Fig. S4.** TEM image of SiO<sub>2</sub>@SiO<sub>2</sub> after calcination in air at 600 °C.

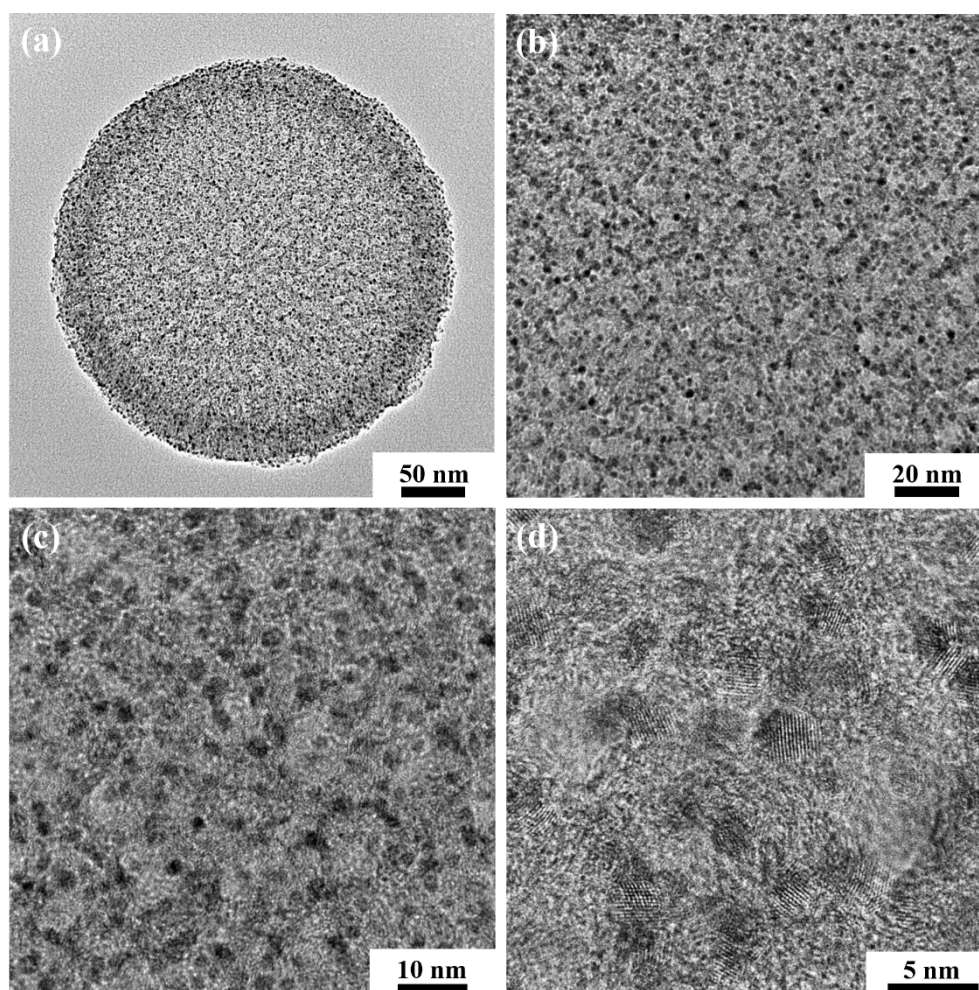

**Fig. S5.** (a-d) HRTEM images of Pt/HCS.

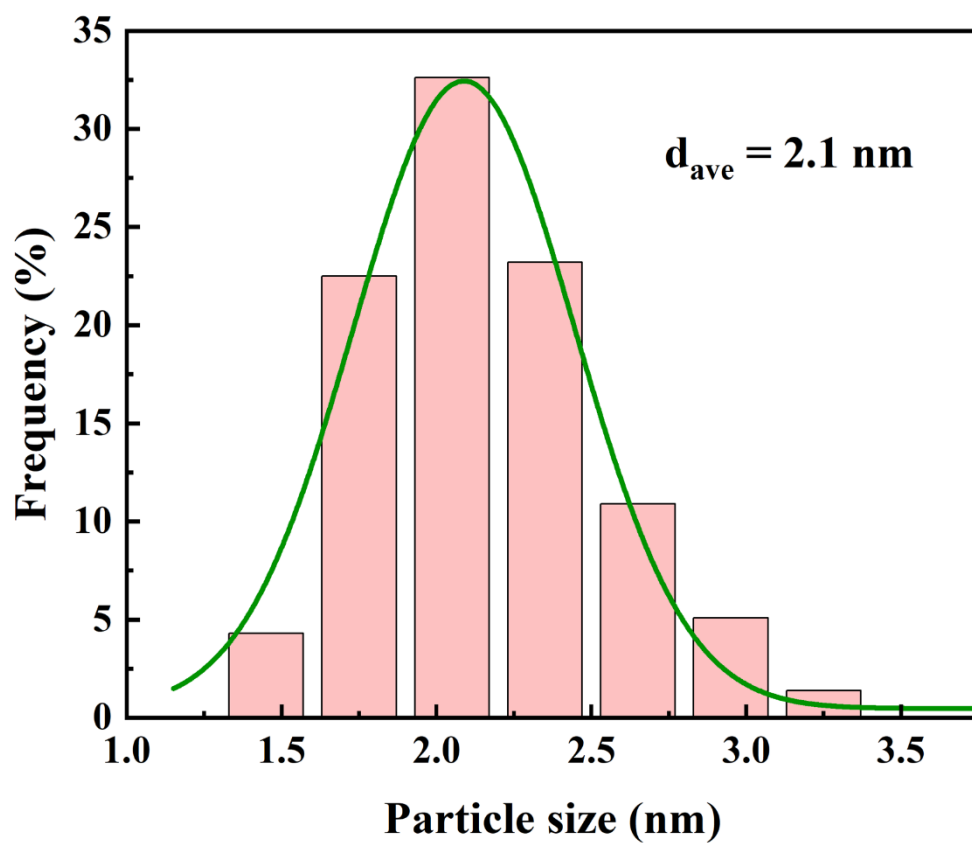

**Fig. S6.** Particle size distribution of Pt/HCS.

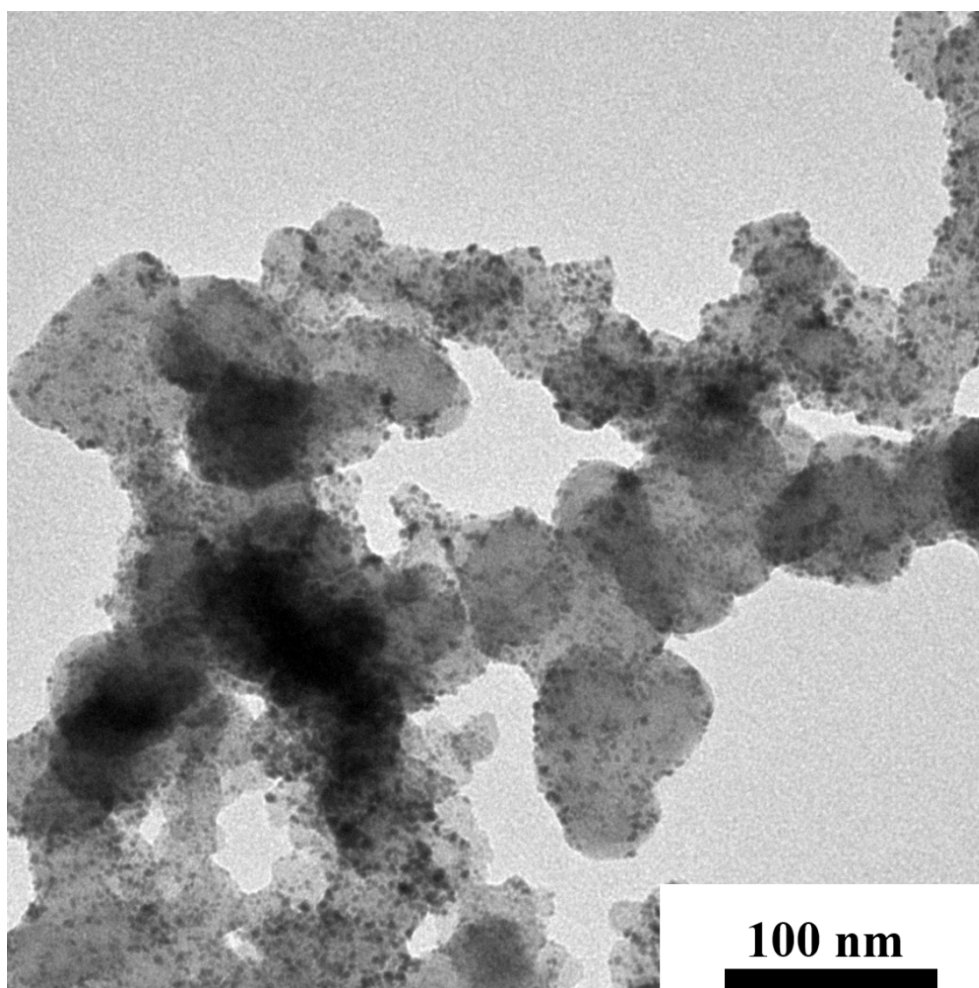

**Fig. S7.** TEM image of Pt/Vulcan.

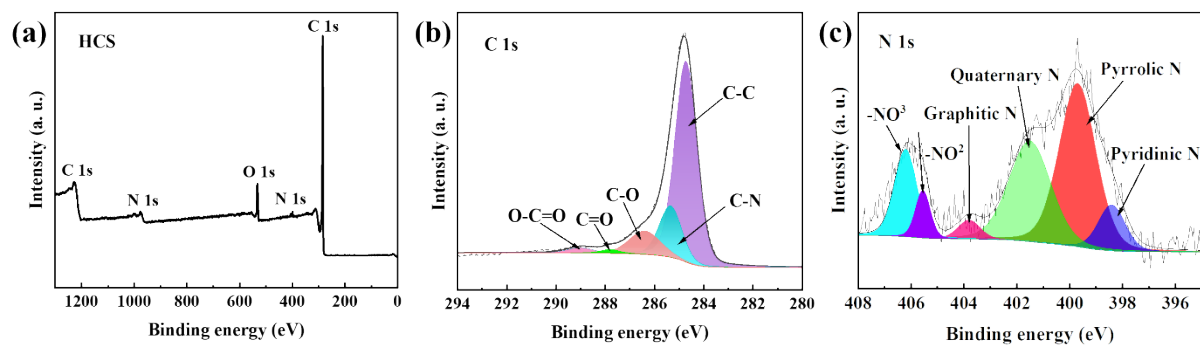

**Fig. S8.** (a) XPS survey, (b) C 1s, and (c) N 1s XPS spectra of N doped HCS.

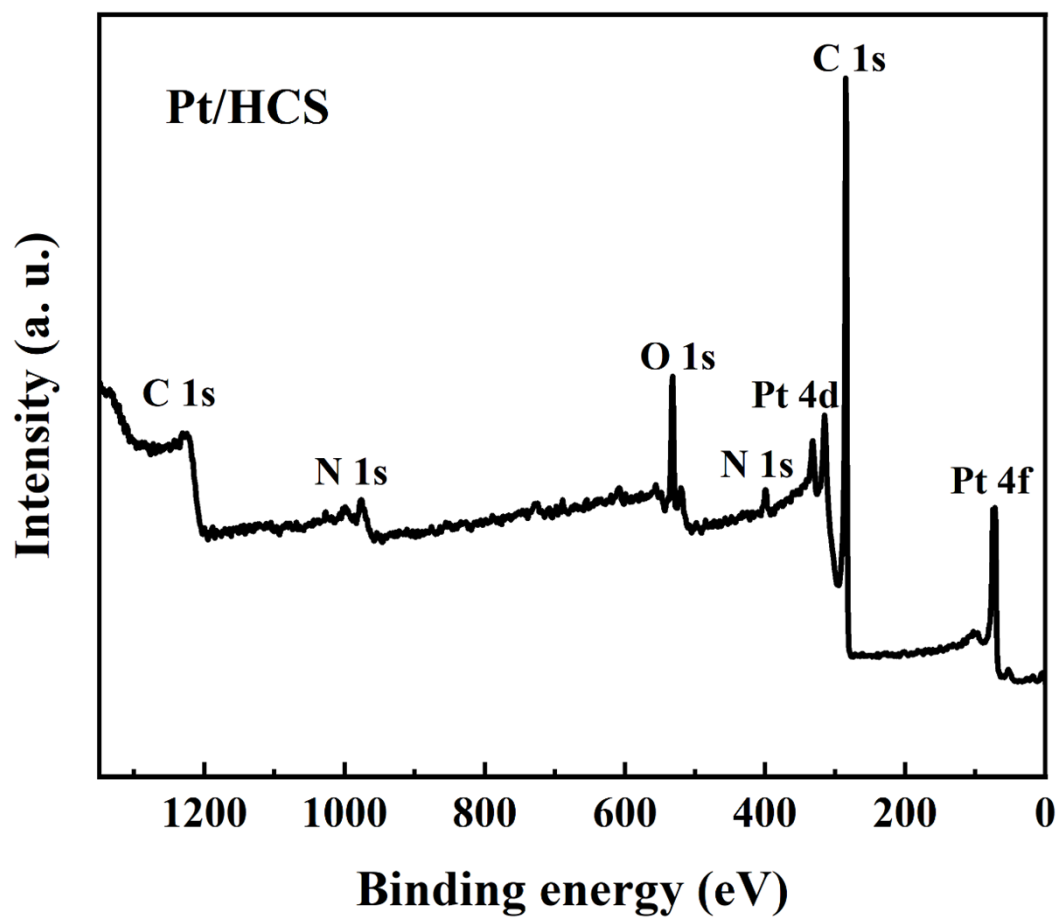

Fig. S9. XPS survey of Pt/HCS.

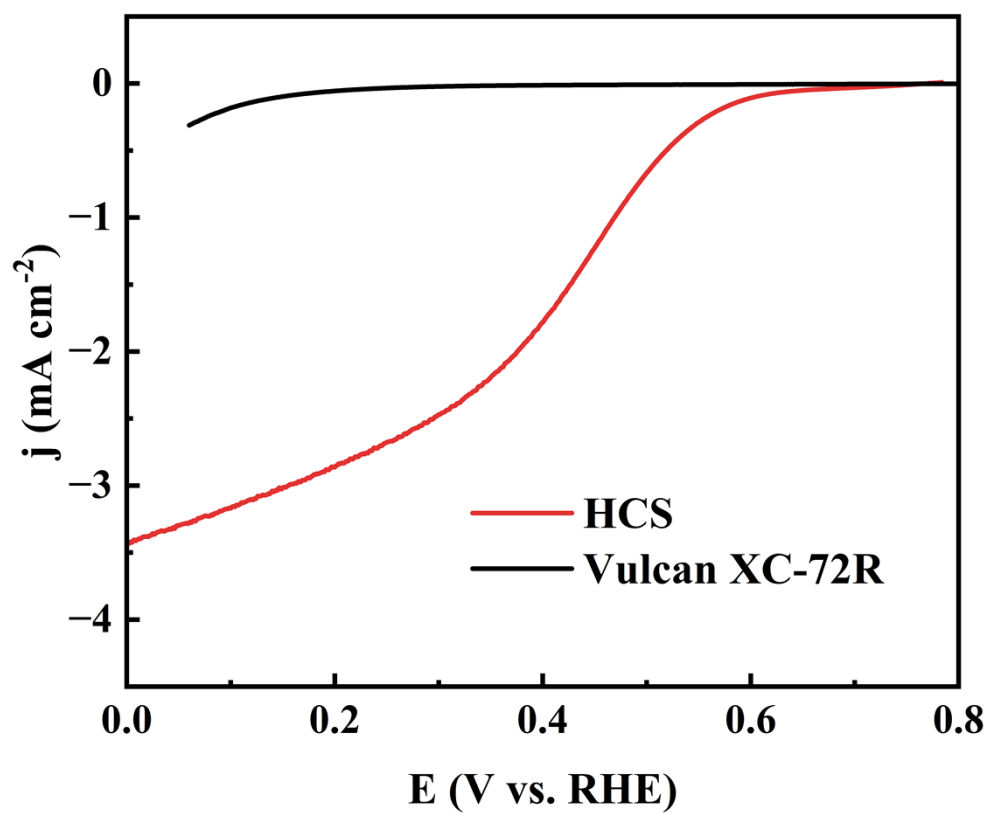

**Fig. S10.** ORR polarization curves of HCS and Vulcan XC-72R in an  $\text{O}_2$ -saturated  $\text{HClO}_4$  solution.

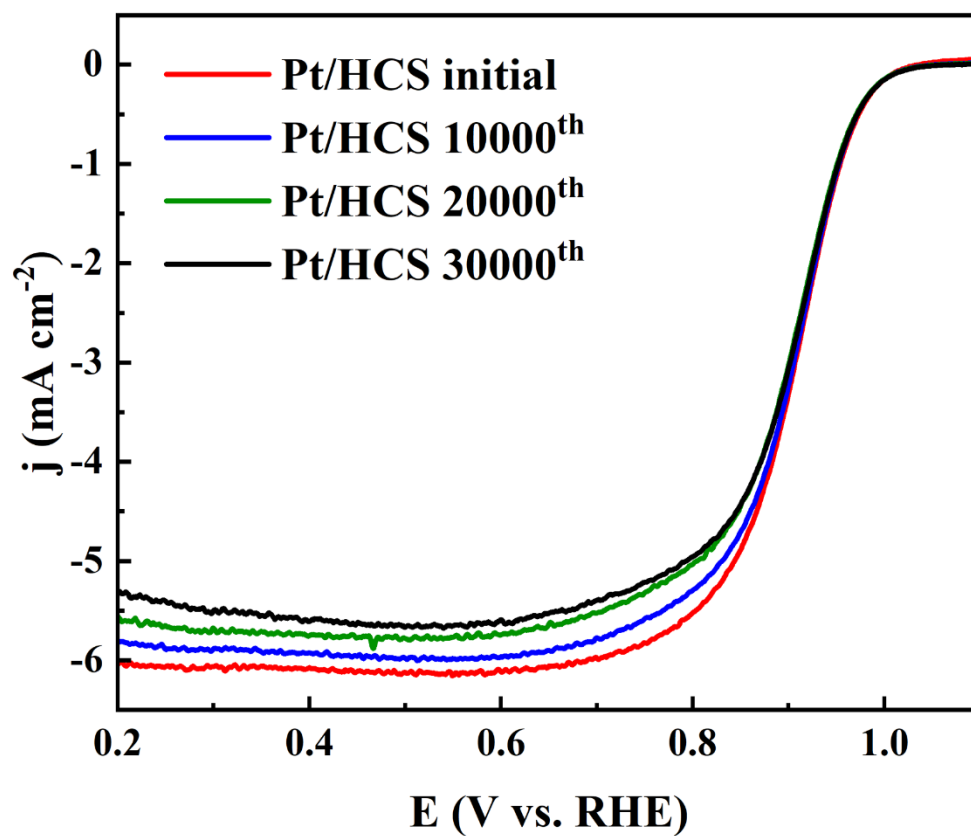

**Fig. S11.** ORR polarization curves of Pt/HCS after different potential cycles between 0.6 and 1.2 V.

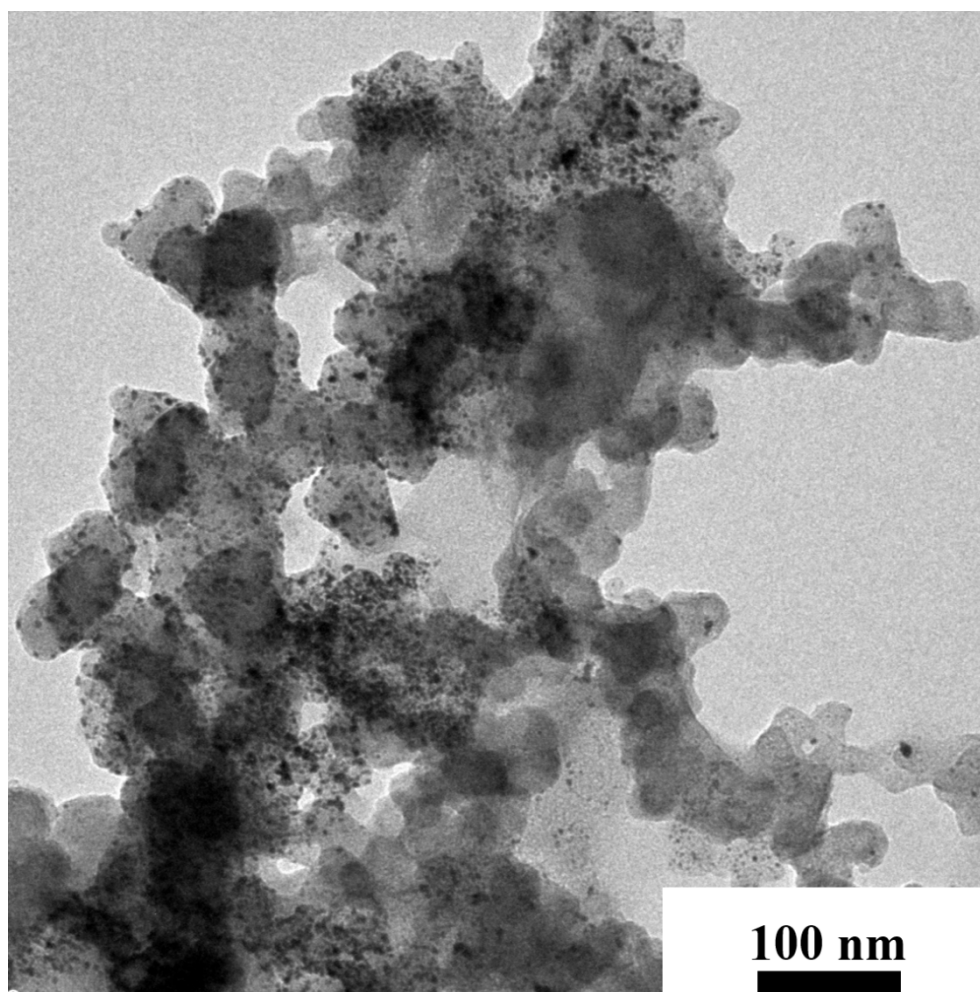

**Fig. S12.** TEM image of Pt/Vulcan after 30000 cycles.

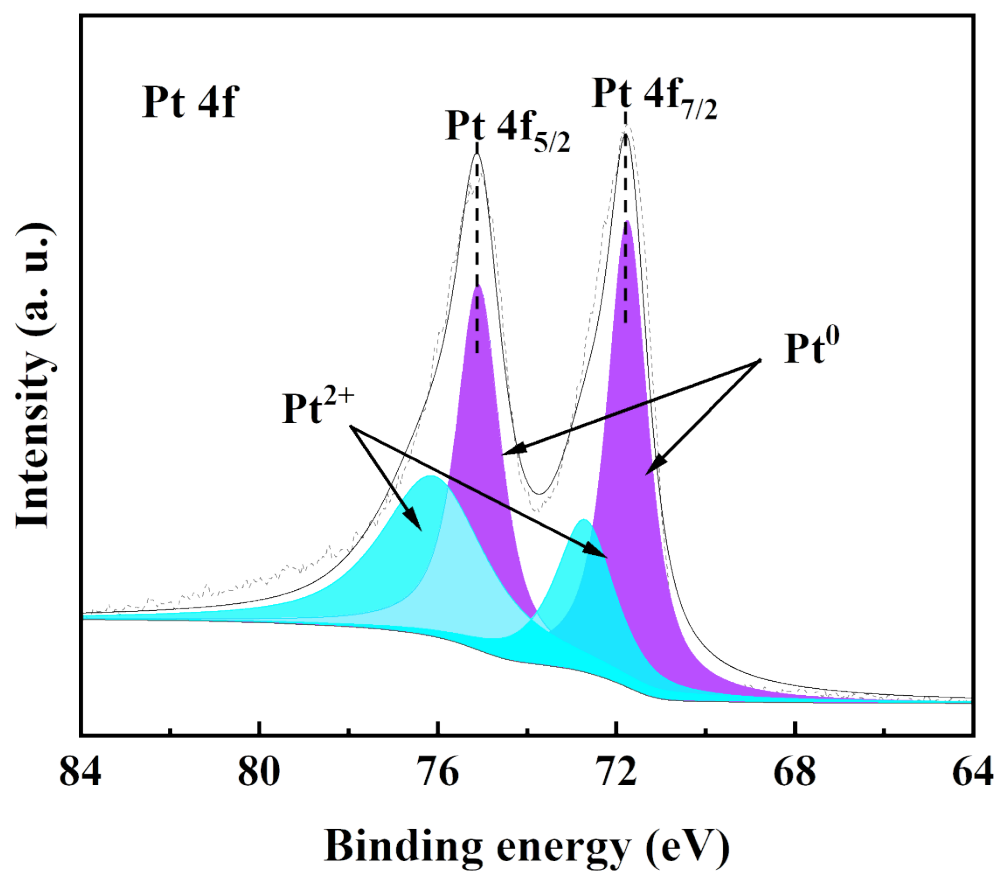

**Fig. S13.** Pt 4f XPS spectrum of Pt/HCS after 30000 cycles.

**Table S1.** The contents of Pt, N, C, and O in HCS and Pt/HCS.

| Sample | Pt (at%) | N (at%) | C (at%) | O (at%) |
|--------|----------|---------|---------|---------|
| Pt/HCS | 2.29     | 2.77    | 85.58   | 9.15    |
| HCS    | -        | 2.28    | 90.76   | 6.96    |

**Table S2.** The contents of the different N species in Pt/HCS.

| Sample | NO <sup>3</sup> | NO <sup>2</sup> | Graphitic N | Quaternary N | Pyrrolic N | Pyridinic N |
|--------|-----------------|-----------------|-------------|--------------|------------|-------------|
|        | (at%)           | (at%)           | (at%)       | (at%)        | (at%)      | (at%)       |
| Pt/HCS | 2.6             | 2.8             | 4.8         | 18.1         | 51.5       | 20.2        |

**Table S3.** Comparison of ORR behavior on the Pt/HCS composite and various Pt-based electrocatalysts.

| Catalysts                    | Mass activity<br>(mA mg <sup>-1</sup> <sub>Pt</sub> ) | Specific activity<br>(mA cm <sup>-1</sup> <sub>Pt</sub> ) | References |
|------------------------------|-------------------------------------------------------|-----------------------------------------------------------|------------|
| Pt/HCS                       | 266                                                   | 0.357                                                     | This work  |
| Pt-N/C PMC                   | 163                                                   | 0.213                                                     | 1          |
| 3ZIF-67-Pt/RGO               | 208                                                   | -                                                         | 2          |
| Pt/OVC                       | 40                                                    | 0.24                                                      | 3          |
| Pt@NC/C                      | 116.5                                                 | -                                                         | 4          |
| Pt/C- TiO <sub>2</sub>       | 205                                                   | -                                                         | 5          |
| Pt/NH <sub>2</sub> -graphene | 172                                                   | 0.29                                                      | 6          |
| Pt/PBI-<br>graphene+FCB      | 183                                                   | -                                                         | 7          |

- [1] Y. Cheng, H. Lu, K. Zhang, F. Yang, W. Dai, C. Liu, H. Dong, X. Zhang, Fabricating Pt-decorated three dimensional N-doped carbon porous microspherical cavity catalyst for advanced oxygen reduction reaction, *Carbon*, 2018, **128**, 38-45.
- [2] W. Wu, Z. Zhang, Z. Lei, X. Wang, Y. Tan, N. Cheng, X. Sun, Encapsulating Pt nanoparticles inside a derived two-dimensional metal-organic frameworks for the enhancement of catalytic activity, *ACS Appl. Mater. Interfaces*, 2020, **12**, 10359-10368.
- [3] E. Teran-Salgado, D. Bahena-Urbe, P. A. Márquez-Aguilar, J. L. Reyes-Rodriguez, R. Cruz-Silva, O. Solorza-Feria, Platinum nanoparticles supported on electrochemically oxidized and exfoliated graphite for the oxygen reduction reaction, *Electrochim. Acta*, 2019, **298**, 172-185.
- [4] J. Liu, W. Li, R. Cheng, Q. Wu, J. Zhao, D. He, S. Mu, Stabilizing Pt nanocrystals encapsulated in N-doped carbon as double-active sites for catalyzing oxygen reduction reaction, *Langmuir*, 2019, **35**, 2580-2586.
- [5] J. Wang, M. Xu, J. Zhao, H. Fang, Q. Huang, W. Xiao, T. Li, D. Wang, Anchoring ultrafine Pt electrocatalysts on TiO<sub>2</sub>-C via photochemical strategy to enhance the stability and efficiency for oxygen reduction reaction, *Appl. Catal. B-Environ.*, 2018, **237**, 228-236.
- [6] L. Xin, F. Yang, S. Rasouli, Y. Qiu, Z.-F. Li, A. Uzunoglu, C.-J. Sun, Y. Liu, P. Ferreira, W. Li, Y. Ren, L. A. Stanciu, J. Xie, Pt nanoparticle anchoring on graphene supports through surface functionalization, *ACS Catal.*, 2016, **6**, 2642-2653.
- [7] Z.- F. Li, L. Xin, F. Yang, Y. Liu, Y. Liu, H. Zhang, L. Stanciu, J. Xie, Hierarchical polybenzimidazole-grafted graphene hybrids as supports for Pt nanoparticle catalysts with excellent PEMFC performance, *Nano Energy*, 2015, **16**, 281-292.
